# Supplementary material for: Rapid Apta-Chromogenic Detection Method for Nitrofuran Metabolite Determination
Source: MDPI journal article supplement (doi:10.3390/molecules29081720), 2024-04-10
Supplement: s1 [file s1]

## **Supplement data**

### **Rapid Apta-Chromogenic Detection Method for Nitrofurantoin Metabolite Determination**

Navarat Chaisri, Chutikarn Jaengphop, Ikuo Hirono, Sasimanas Unajak

## **SUPPLEMENT Data**

- Supplemental Data S1** Nucleotide sequence of ssDNA aptamer to AOZ. Colorimetric detection of AuNPs – aptamer to AOZ was demonstrated. The number of identical nucleotide sequences with each round of SELEX screening is shown.
- Supplemental Data S2** Colorimetric determination of AuNPs solution: 1) solution of AuNP with NaCl; 2) solution of AuNP – aptamer complex in the presence of NaCl; and 3) solution of AuNP - aptamer complex in the presence of NaCl and AOZ.
- Supplemental Data S3** Single-stranded DNA aptamer specific to nitrofurans metabolites, including (A) 3-amino-5-morpholinomethyl-1,3-oxazolidin-2-one (AMOZ) and (B) 1-amino-hydantoin (AHD), with limits of detection of 0.06 ppb and 10 ppb, respectively.
- Supplemental Data S4** Comparison of different techniques for the detection of nitrofurans or AOZ in aquatic animal products.

## Supplement Data S1

| Number of identical sequences | AuNPs colorimetric test                                                             | Aptamer clone                                                                                          |
|-------------------------------|-------------------------------------------------------------------------------------|--------------------------------------------------------------------------------------------------------|
| 9                             | 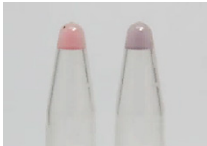   | 7 <sup>th</sup> round: 3 clones<br>9 <sup>th</sup> round: 2 clones<br>10 <sup>th</sup> round: 4 clones |
| 2                             |    | 6 <sup>th</sup> round: 2 clones                                                                        |
| 2                             |   | 6 <sup>th</sup> round: 2 clones                                                                        |
| 2                             |  | 7 <sup>th</sup> round: 2 clones                                                                        |
| 2                             |  | 6 <sup>th</sup> round: 2 clones                                                                        |

### Supplement Data S2

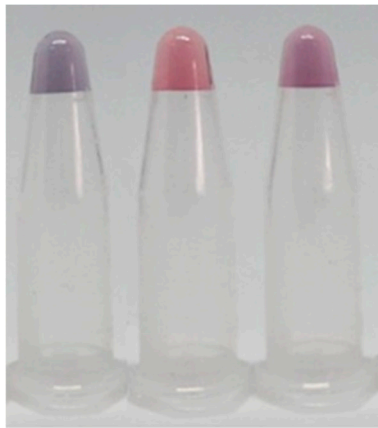

1

2

3

1 = AuNP + NaCl

2 = AuNP-Apt + NaCl

3 = AuNP-Apt + AOZ + NaCl

### Supplement Data S3

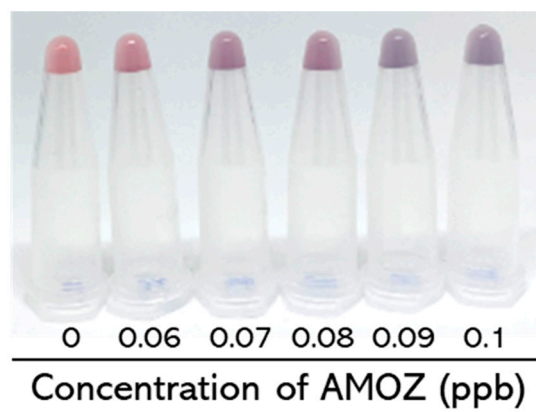

(A)

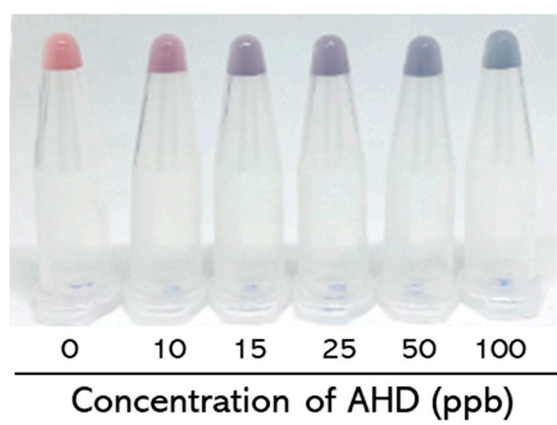

(B)

### Supplement Data S4

| No. | Name of the antibiotic        | Type of technique                                                                                                                           | Biorecognition element      | LOD               | Reference                     |
|-----|-------------------------------|---------------------------------------------------------------------------------------------------------------------------------------------|-----------------------------|-------------------|-------------------------------|
| 1   | Nitrofuran                    | Liquid Chromatography-Photodiode Array Detection (UPLC-DAD)                                                                                 | 2-nitrobenzaldehyde (2-NBA) | 0.25–0.33 µg/kg   | Wang <i>et al.</i> , 2003     |
| 2   | Nitrofuran                    | High-performance liquid chromatography with a diode-array detector (HPLC-DAD) and liquid chromatography-tandem mass spectrometry (LC–MS/MS) |                             | 0.2–0.4 µg/L      | Yu <i>et al.</i> , 2013       |
| 3   | 3-amino-2-oxazolidinone (AOZ) | Enzyme-linked immunosorbent assay (ic-ELISA)                                                                                                | 2-nitrobenzaldehyde (2-NBA) | 0.15 and 0.3µg/kg | Liu <i>et al.</i> , 2010      |
| 4   | Nitrofuran                    | High Performance Liquid Chromatography Diode Array Detection (HPLC-DAD)                                                                     |                             | 1 µg/kg           | Fernando <i>et al.</i> , 2017 |
| 5   | 3-amino-2-oxazolidinone (AOZ) | Apta-Chromogenic Detection                                                                                                                  |                             | 0.03 µg/kg (ppb)  | This work                     |
